# Supplementary material for: Integrated Physiological and Transcriptomic Analyses Revealed Improved Cold Tolerance in Cucumber (Cucumis sativus L.) by Exogenous Chitosan Oligosaccharide
Source: MDPI journal article supplement (doi:10.3390/ijms24076202), 2023-03-25
Supplement: s1 [file s1]

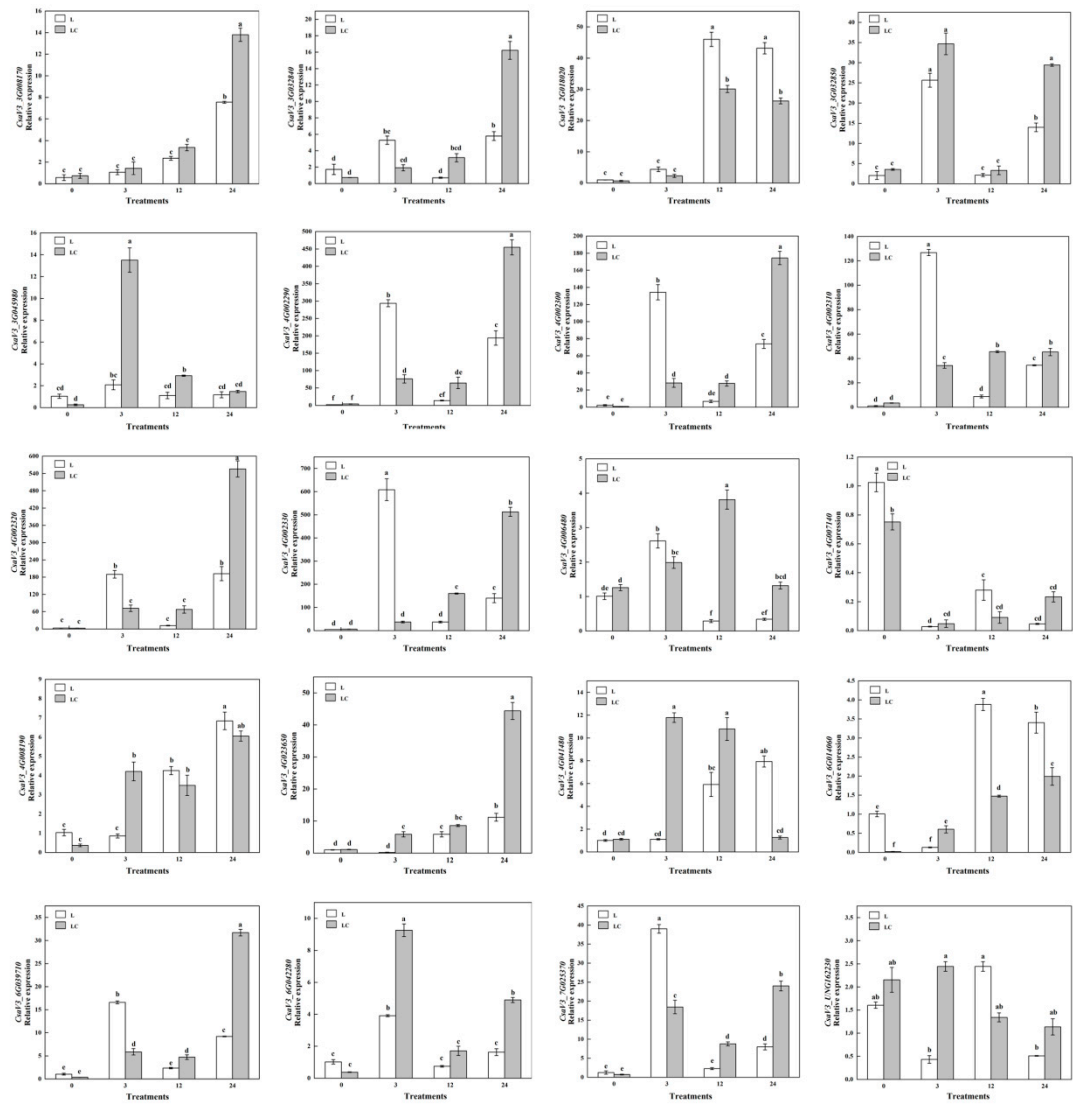

**Figure S1.** qRT-PCR validation of the DEGs of RNA-seq data.

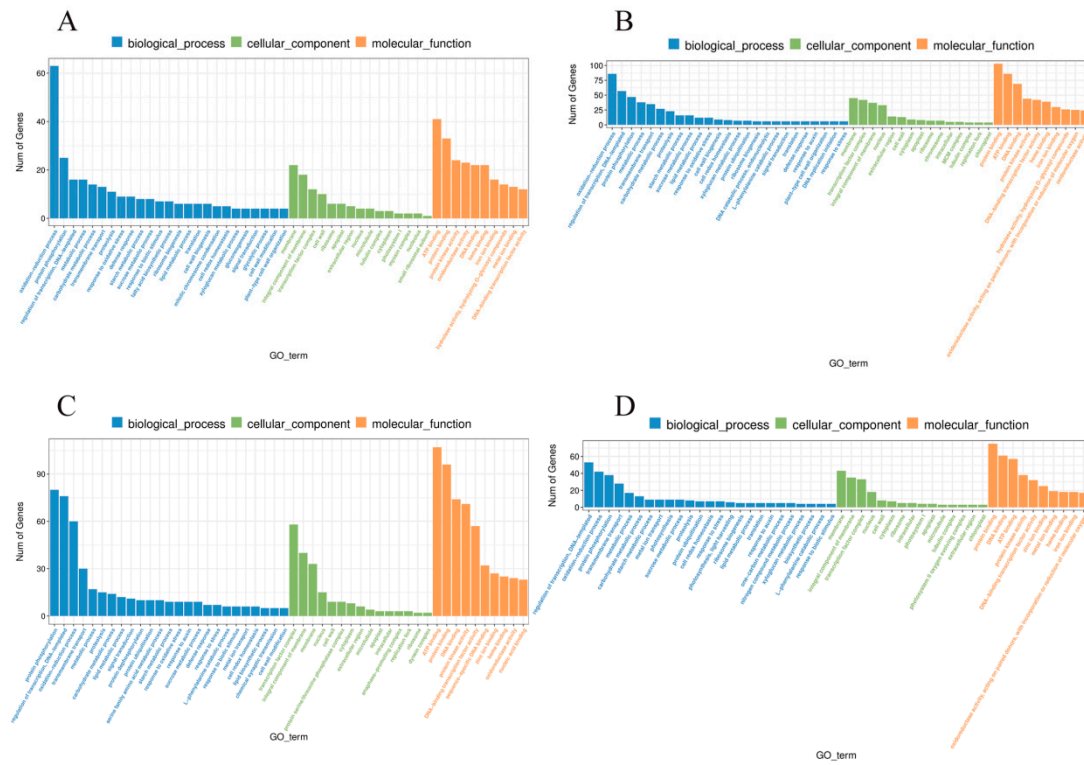

**Figure S2.** GO analysis of DEGs in (A) LC0 vs. L0, (B) LC3 vs. L3, (C) LC12 vs. L12, (D) LC24 vs. L24 pairwise comparison. The Y and X axes correspond to GO terms and the number of DEGs.

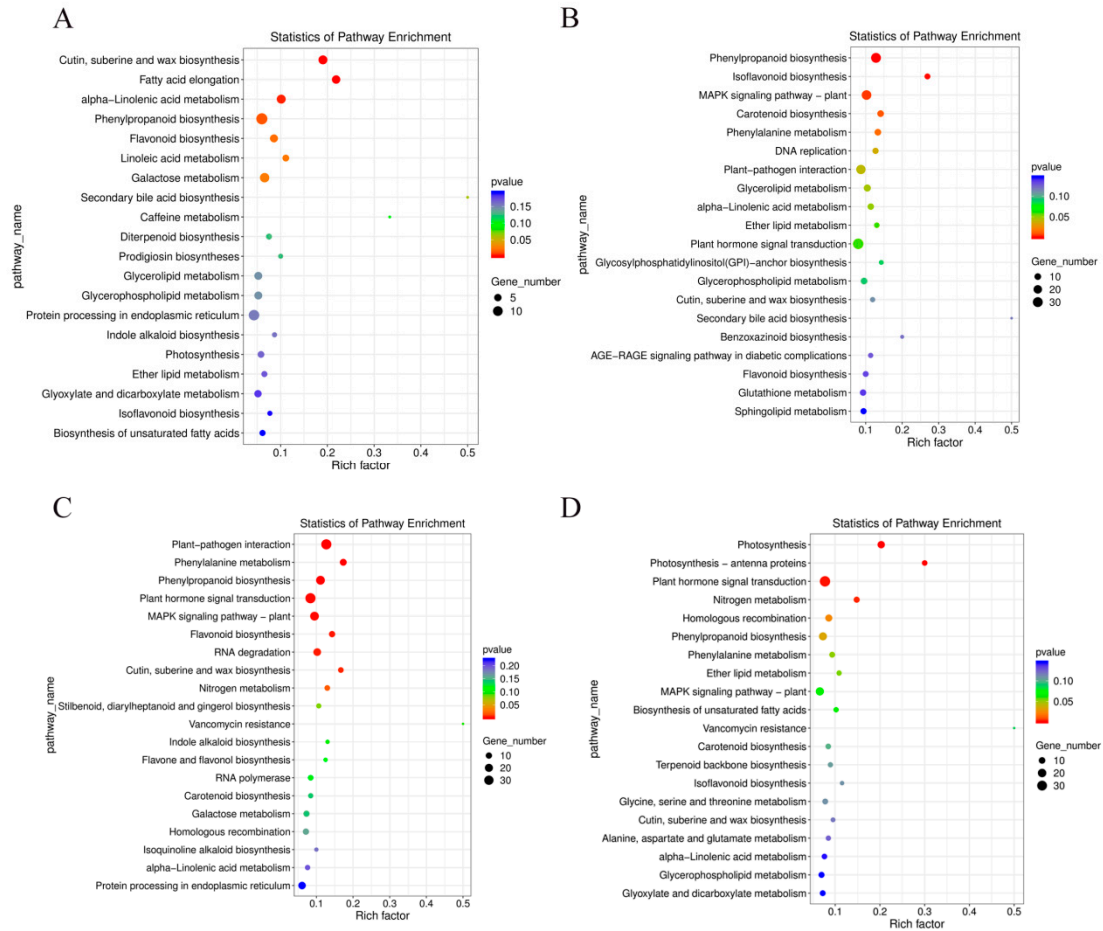

**Figure S3.** KEGG enrichment analysis of DEGs in (A) LC0 vs. L0, (B) LC3 vs. L3, (C) LC12 vs. L12, (D) LC24 vs. L24 pairwise comparison. The Y-axis corresponds to the KEGG pathway, and the X-axis shows the enrichment ratio between the number of DEGs enriched in a particular pathway. The color of the dot represents the q-value, and the size of the dot represents the number of DEGs mapped to the referent pathway.

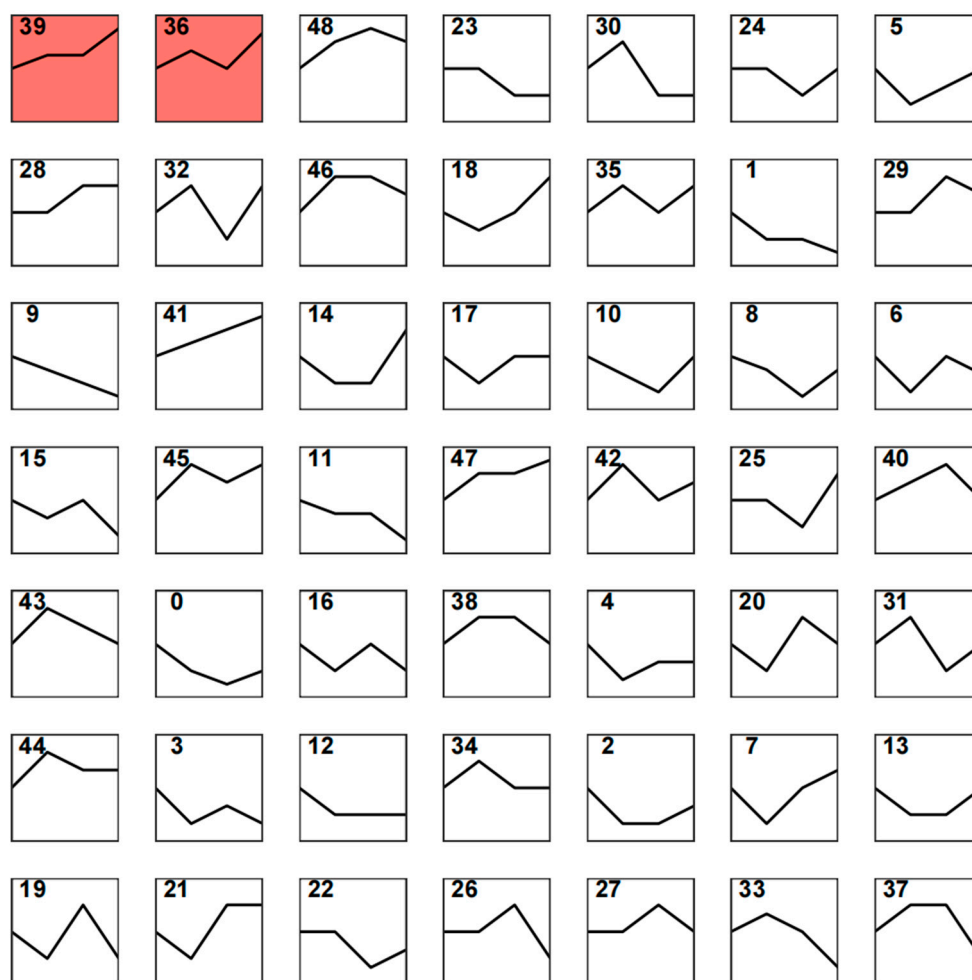

**Figure S4.** The expression tendency of the DEGs across four treatments (LC0, LC3, LC12, and LC24) inferred by STEM analysis.
